# Supplementary material for: The 'Switch’ study protocol: a randomised-controlled trial of switching to an alternative tumour-necrosis factor (TNF)-inhibitor drug or abatacept or rituximab in patients with rheumatoid arthritis who have failed an initial TNF-inhibitor drug
Source: PubMed Central journal article supplement (PMC4391115; doi:10.1186/1471-2474-15-452), 2014-12-23

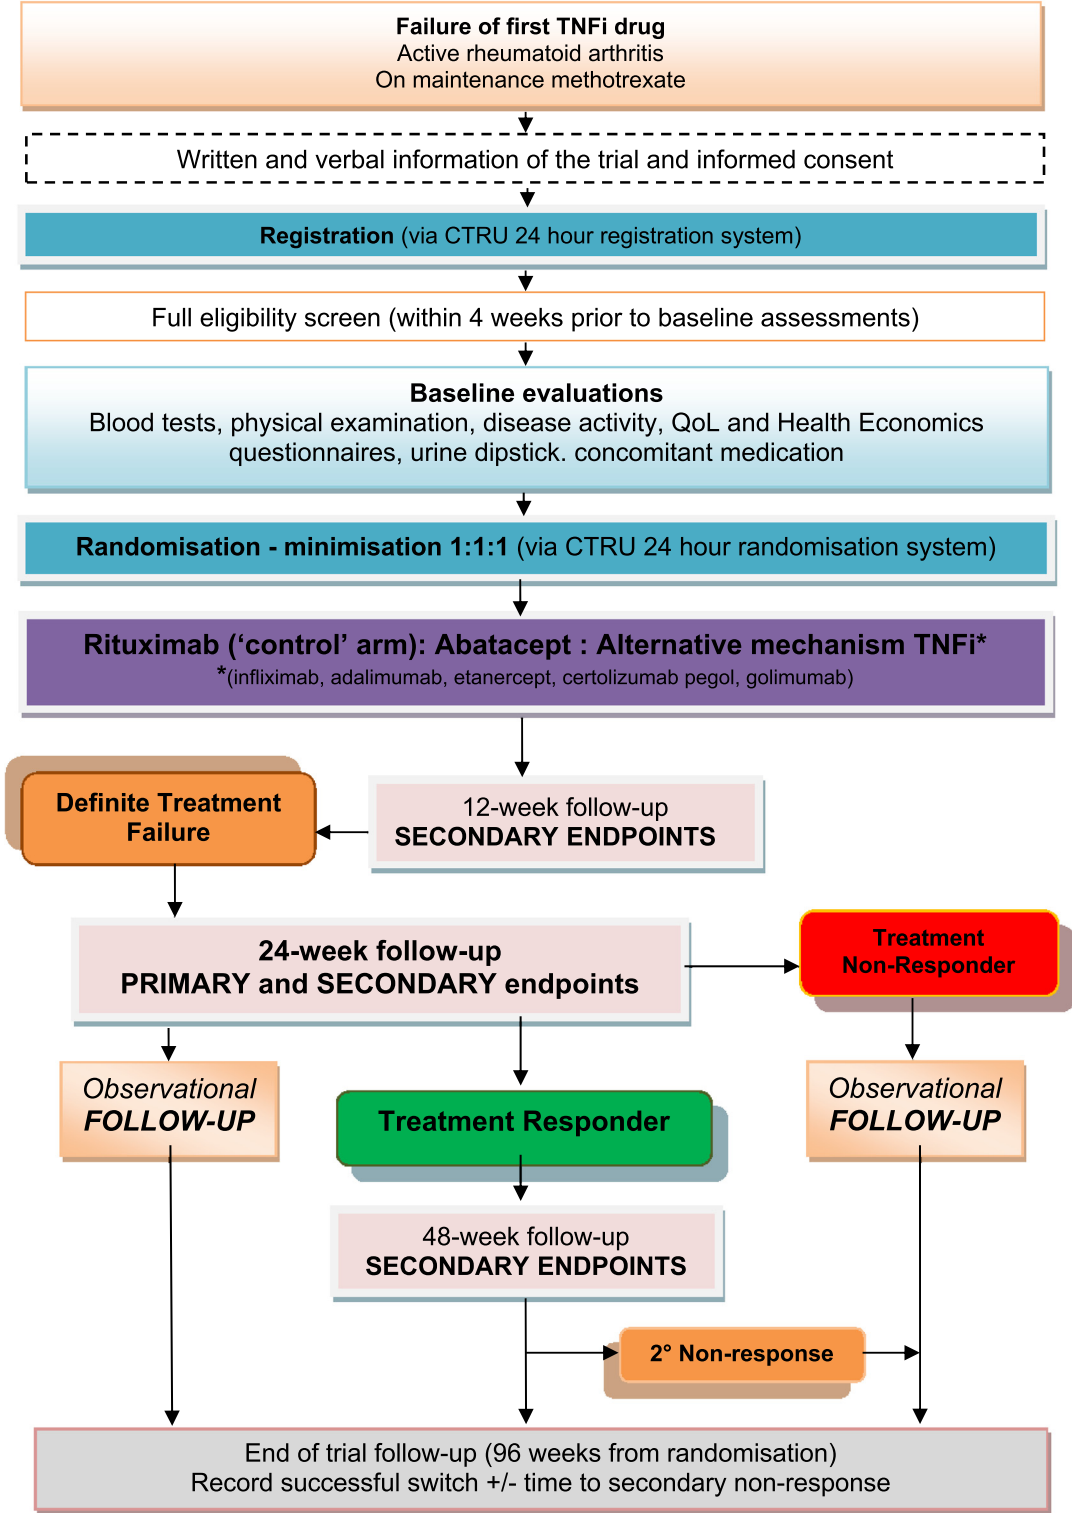

Supplement: 12891_2014_2445_MOESM1_ESM.pdf [file 12891_2014_2445_MOESM1_ESM.pdf]
